# Supplementary material for: Modification of oligonucleotides with weak basic residues via the 2′-O-carbamoylethyl linker for improving nuclease resistance without loss of duplex stability and antisense activity
Source: Royal Society of Chemistry journal article supplement (doi:10.1039/c9ob00668k), 2019-01-01
Supplement: c9ob00668k1.pdf [file c9ob00668k1.pdf]

## SUPPLYMENTARY INFORMATION

### **Modification of oligonucleotides with weak basic residues via 2'-O-carbamoylethyl linker for improving nuclease resistance without loss of duplex stability and antisense activity**

Yoshiaki Masaki,<sup>a</sup> Keishi Yamamoto,<sup>a</sup> Keita Yoshida,<sup>a</sup> Atsuya Maruyama,<sup>a</sup> Takahito Tomori,<sup>a</sup> Yusuke Iriyama,<sup>b</sup> Hiroyuki Nakajima,<sup>c</sup> Tatsuro Kanaki,<sup>c</sup> and Kohji Seio<sup>a\*</sup>

- a. Department of Life Science and Technology, Tokyo Institute of Technology, 4259 J2-16, Nagatsuta-cho, Midori-ku, Yokohama, Kanagawa, 226-8501, Japan.
- b. Nissan Chemical Corporation, Chemical Research Laboratories, Funabashi, Japan.
- c. Nissan Chemical Corporation, Biological Research Laboratories, Shiraoka, Japan..

## Contents

|                                                                                                     |    |
|-----------------------------------------------------------------------------------------------------|----|
| <sup>1</sup> H-NMR and <sup>13</sup> C-NMR spectra of compound <b>1'</b> .....                      | 3  |
| <sup>1</sup> H-NMR and <sup>13</sup> C-NMR spectra of compound <b>2</b> .....                       | 4  |
| <sup>1</sup> H-NMR and <sup>13</sup> C-NMR spectra of compound <b>3</b> .....                       | 5  |
| <sup>1</sup> H-NMR and <sup>13</sup> C-NMR spectra of compound <b>4a</b> .....                      | 6  |
| <sup>1</sup> H-NMR, <sup>13</sup> C-NMR and <sup>31</sup> P-NMR spectra of compound <b>5a</b> ..... | 7  |
| <sup>1</sup> H-NMR and <sup>13</sup> C-NMR spectra of compound <b>4b</b> .....                      | 9  |
| <sup>1</sup> H-NMR, <sup>13</sup> C-NMR and <sup>31</sup> P-NMR spectra of compound <b>5b</b> ..... | 10 |
| <sup>1</sup> H-NMR and <sup>13</sup> C-NMR spectra of compound <b>4c</b> .....                      | 12 |
| <sup>1</sup> H-NMR, <sup>13</sup> C-NMR and <sup>31</sup> P-NMR spectra of compound <b>5c</b> ..... | 13 |
| <sup>1</sup> H-NMR and <sup>13</sup> C-NMR spectra of compound <b>4d</b> .....                      | 15 |
| <sup>1</sup> H-NMR, <sup>13</sup> C-NMR and <sup>31</sup> P-NMR spectra of compound <b>5d</b> ..... | 16 |
| <b>Figure S1</b> HPLC chart of synthesized oligonucleotides for nuclease resistance .....           | 18 |
| <b>Figure S2</b> HPLC chart of synthesized oligonucleotides for $T_m$ and antisense activity .....  | 19 |
| <b>Table S1.</b> Summary of mass values of synthesized oligonucleotide .....                        | 20 |
| <b>Figure S3</b> Observed MALDI-TOF-Mass spectrum of each oligonucleotide .....                     | 21 |
| <b>Figure S4</b> Observed melting curve of each duplex .....                                        | 22 |

***N*<sup>3</sup>-benzoyl-2'-*O*-{2-(methoxycarbonyl)ethyl} 3',5'-*O*-(1,1,3,3-tetraisopropylidisiloxane-1,3-diyl) 5-methyluridine (1')**

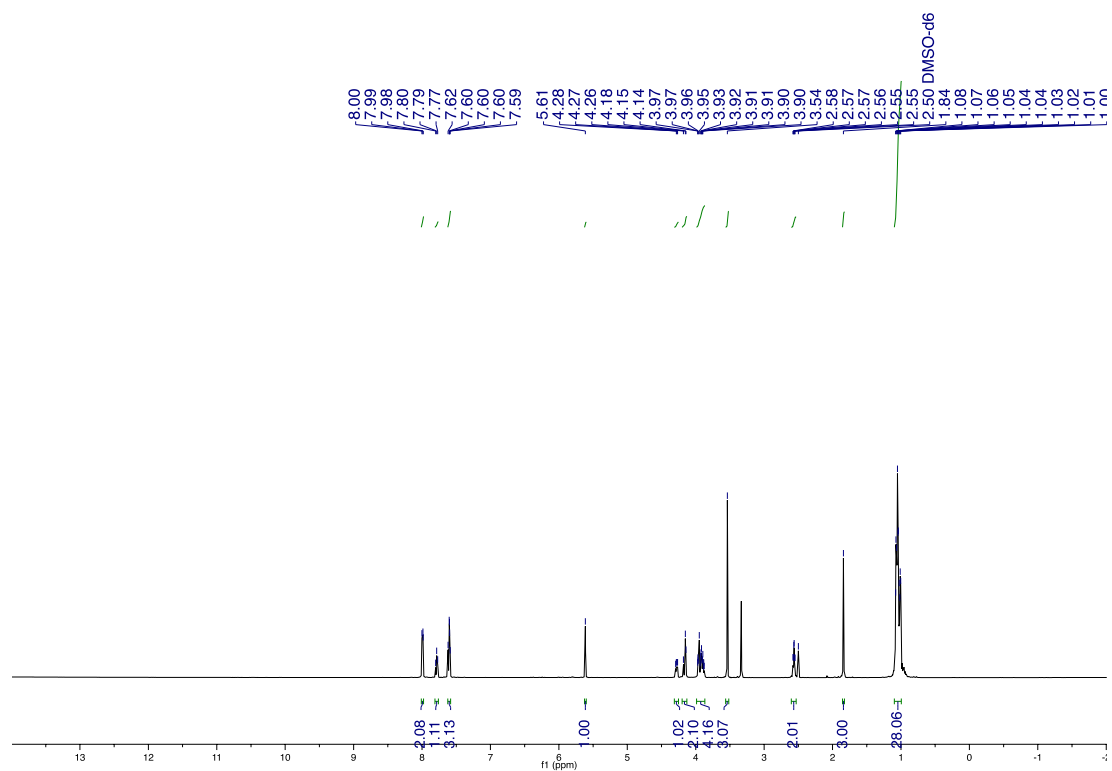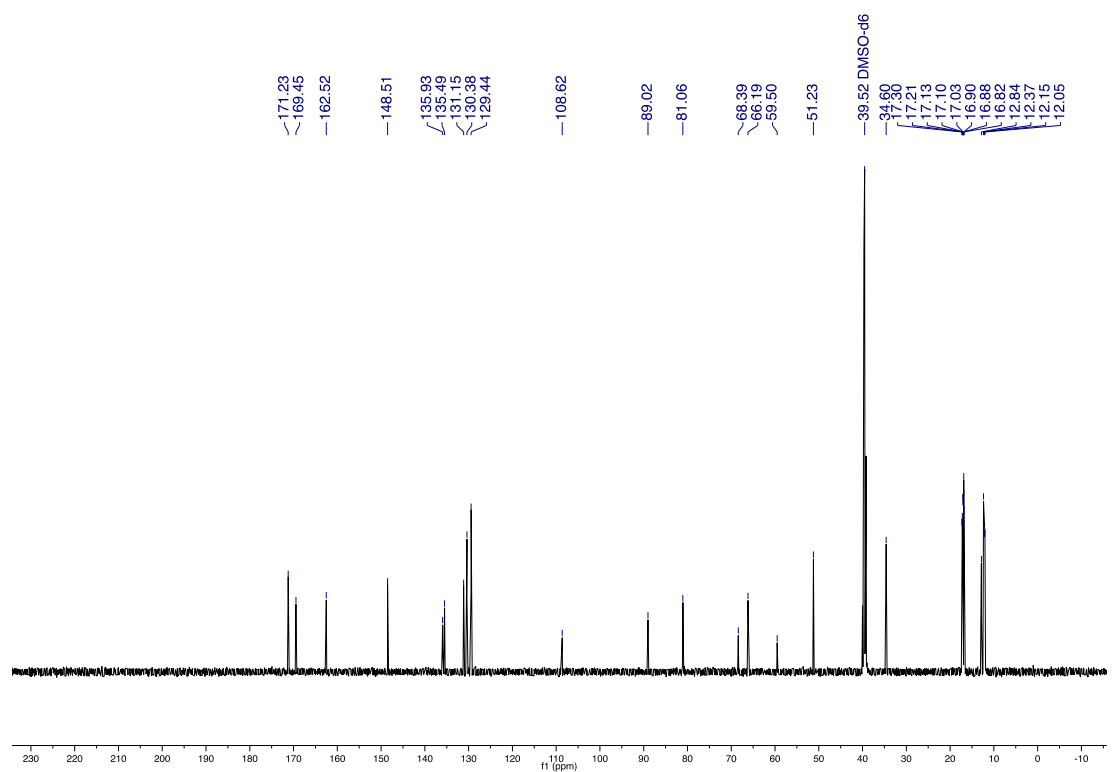

**N<sup>3</sup>-benzoyl-2'-O-(2-methoxycarbonylethyl)-5-methyluridine (2)**

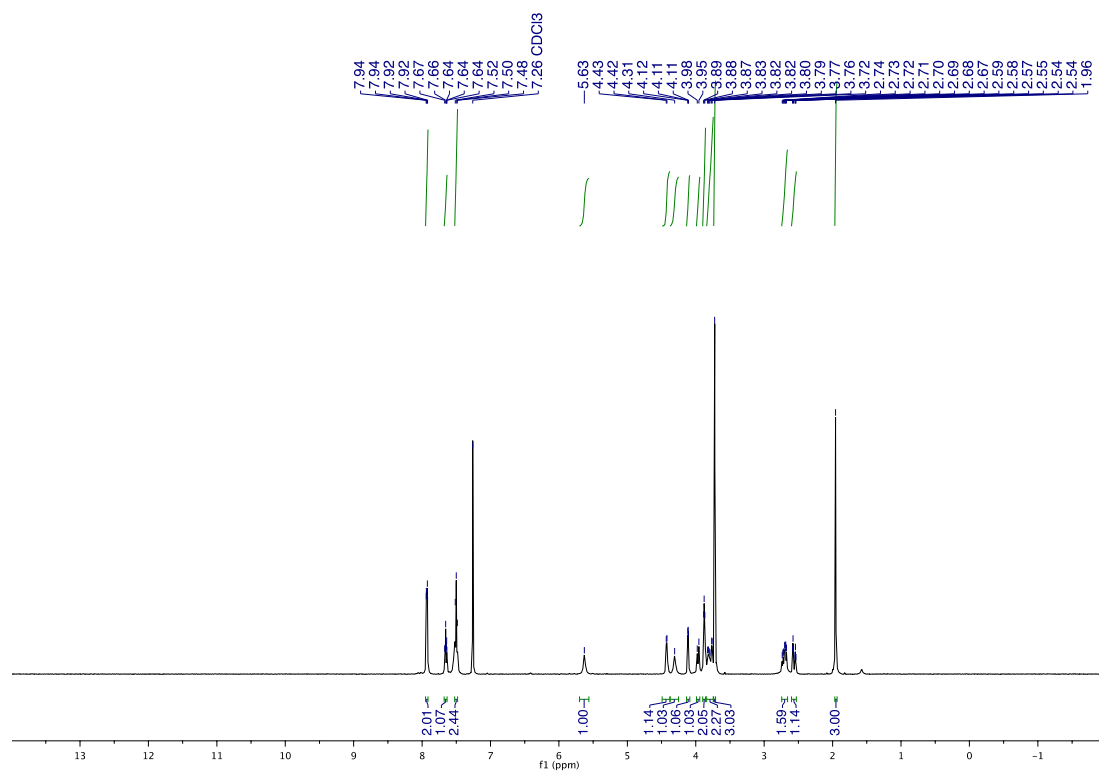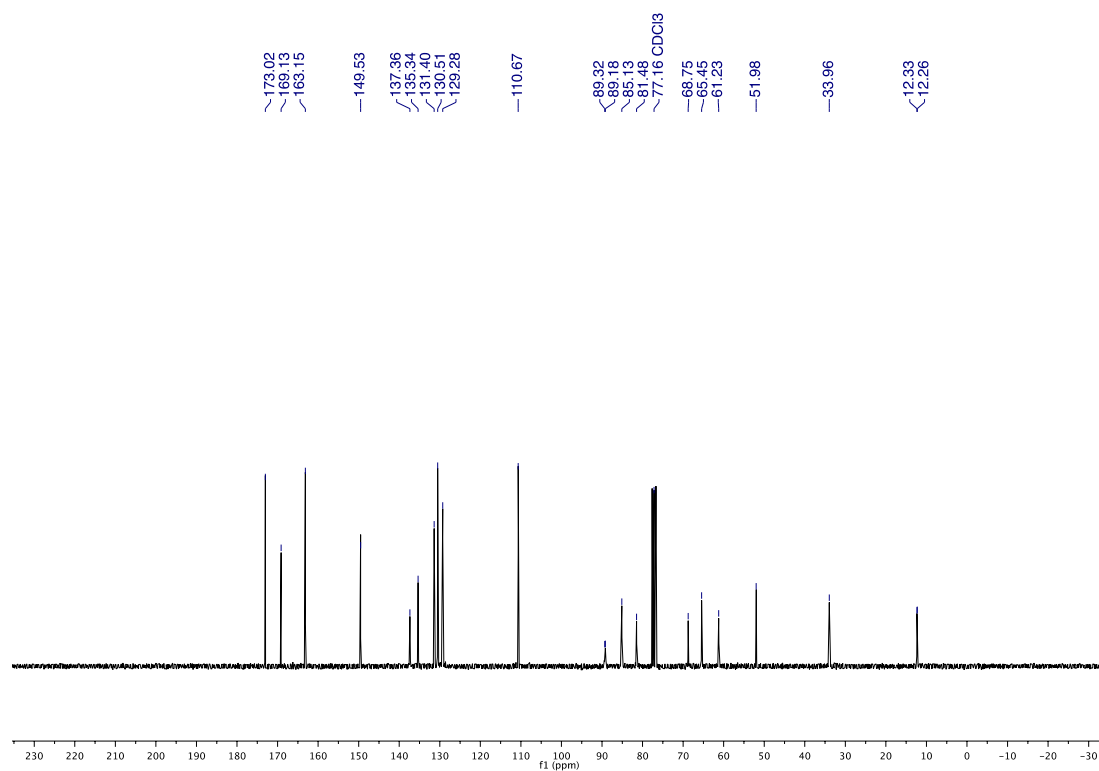

***N*<sup>3</sup>-benzoyl-2'-*O*-(2-methoxycarbonylethyl)-5'-*O*-(4,4'-dimethoxytrityl)-5-methyluridine (3)**

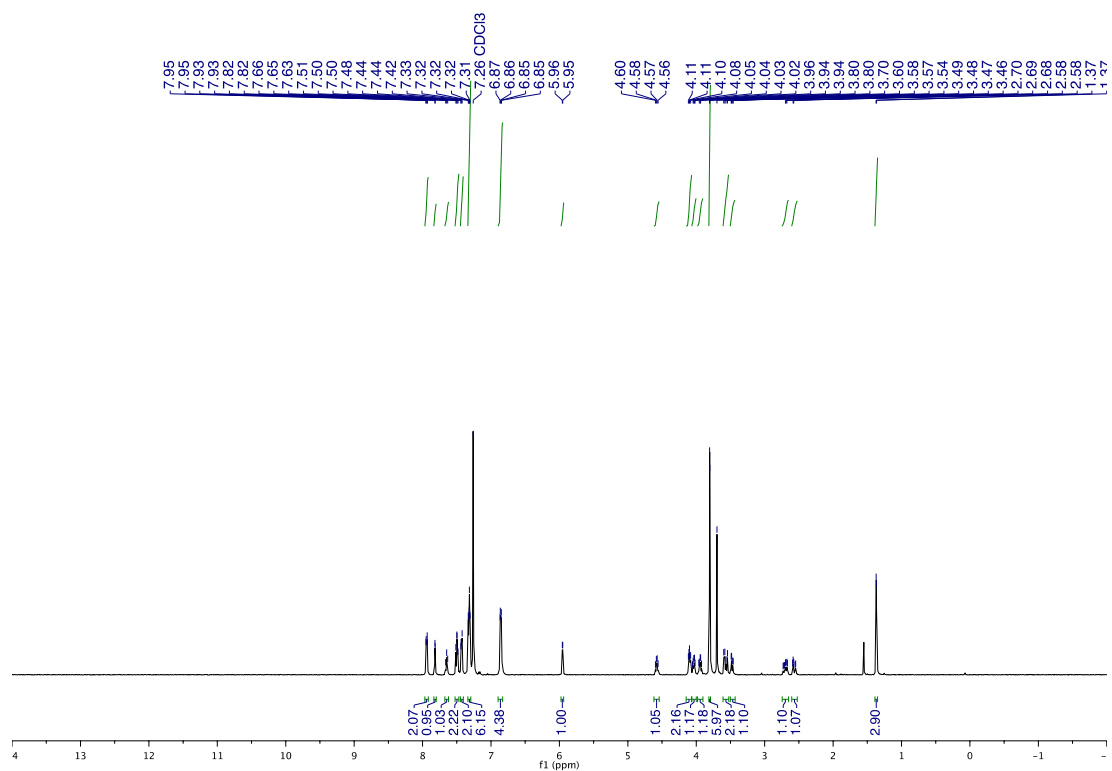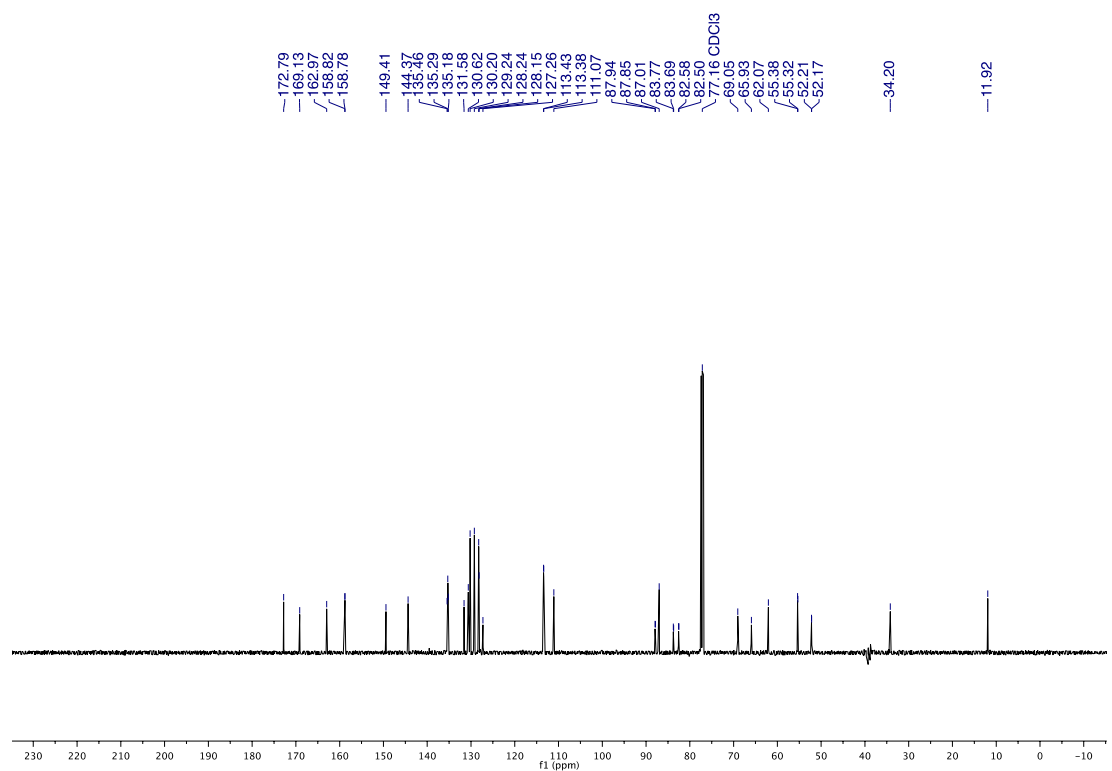

**<sup>1</sup>H-NMR of compound 4a (PyECE)**

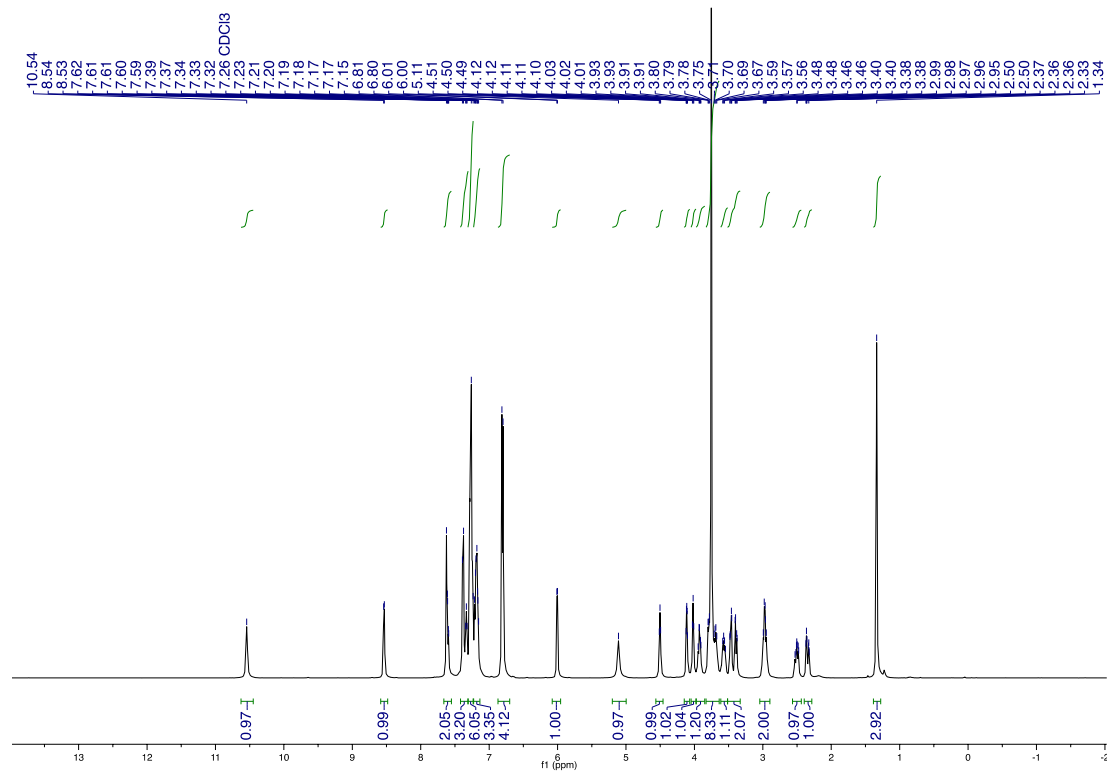

**<sup>13</sup>C-NMR of compound 4a (PyECE)**

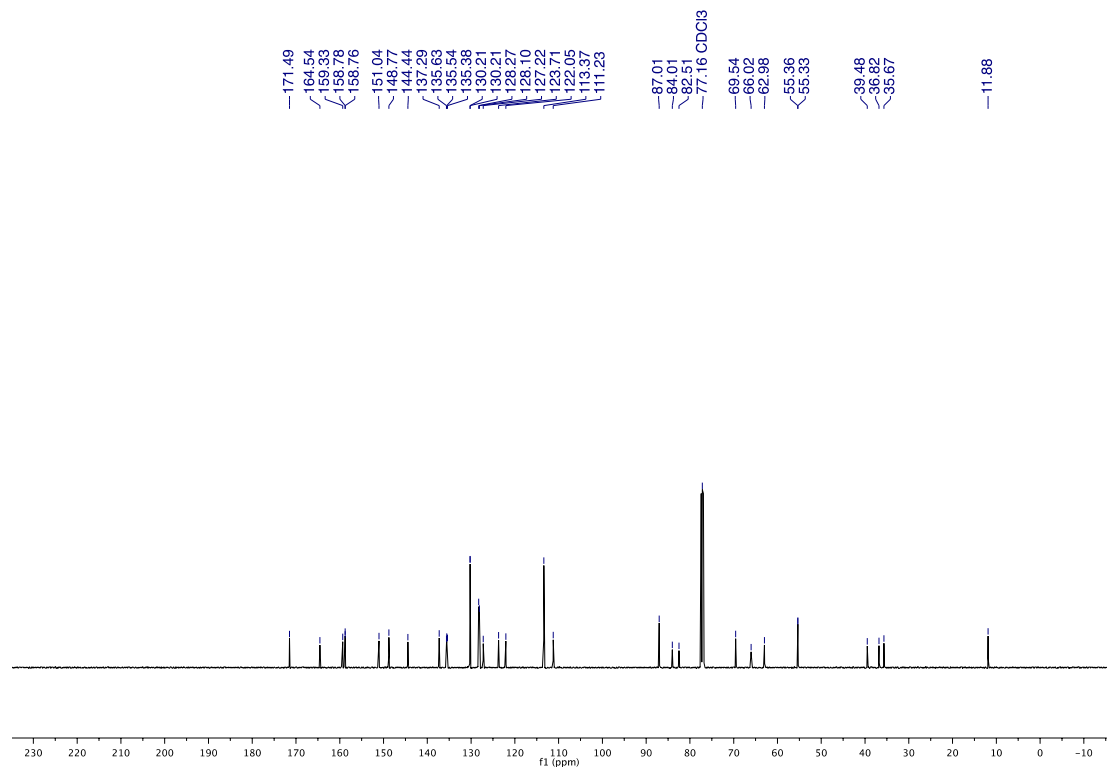

**<sup>1</sup>H-NMR of compound 5a (PyECE)**

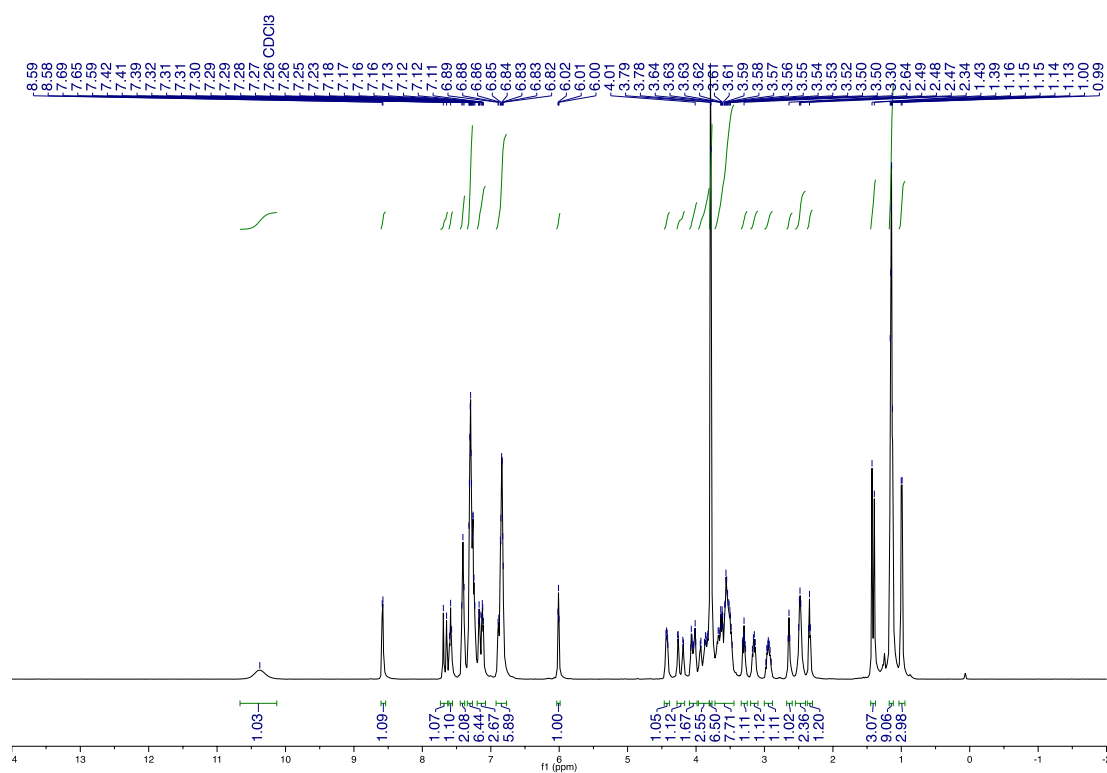

**<sup>13</sup>C-NMR of compound 5a (PyECE)**

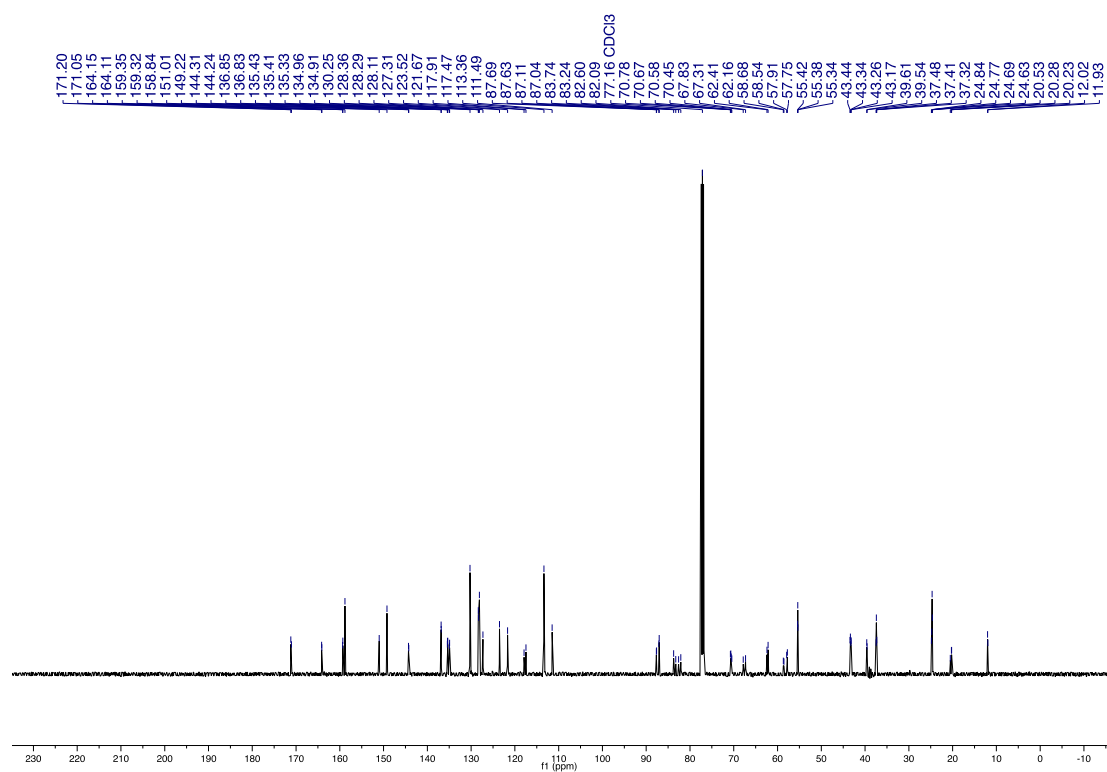

### <sup>31</sup>P-NMR of compound 5a (PyECE)

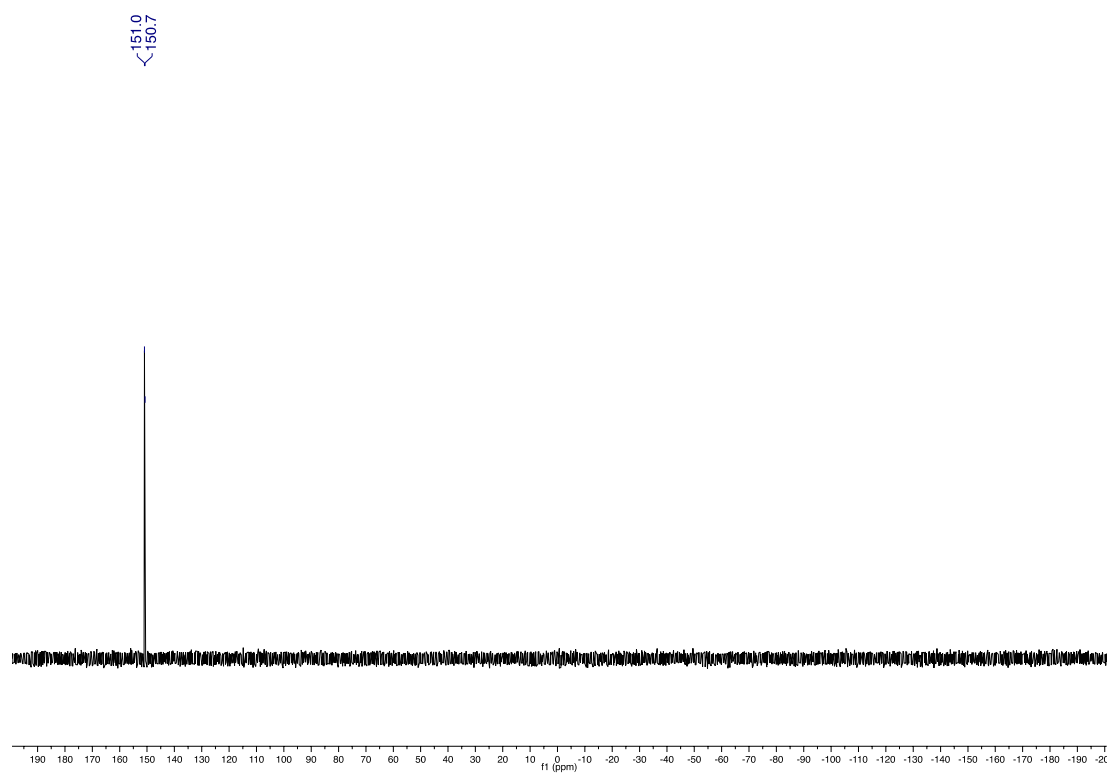



### <sup>1</sup>H-NMR of compound 4b (DMAECE)

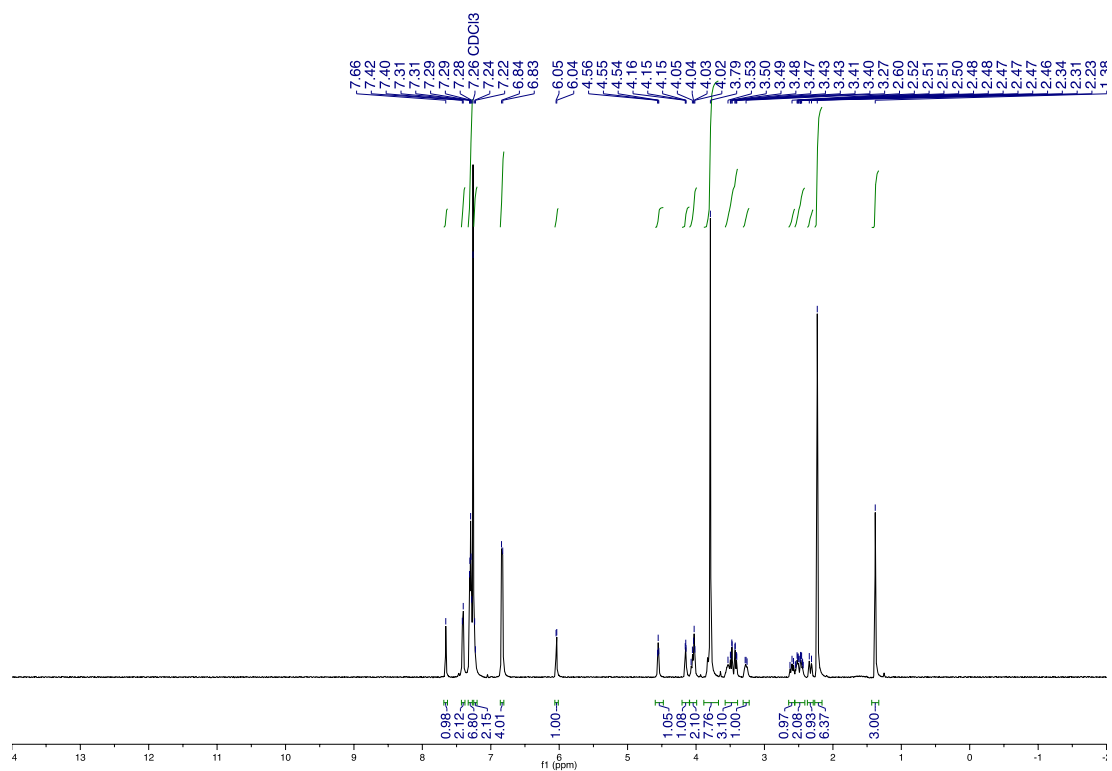

### <sup>13</sup>C-NMR of compound 4b (DMAECE)

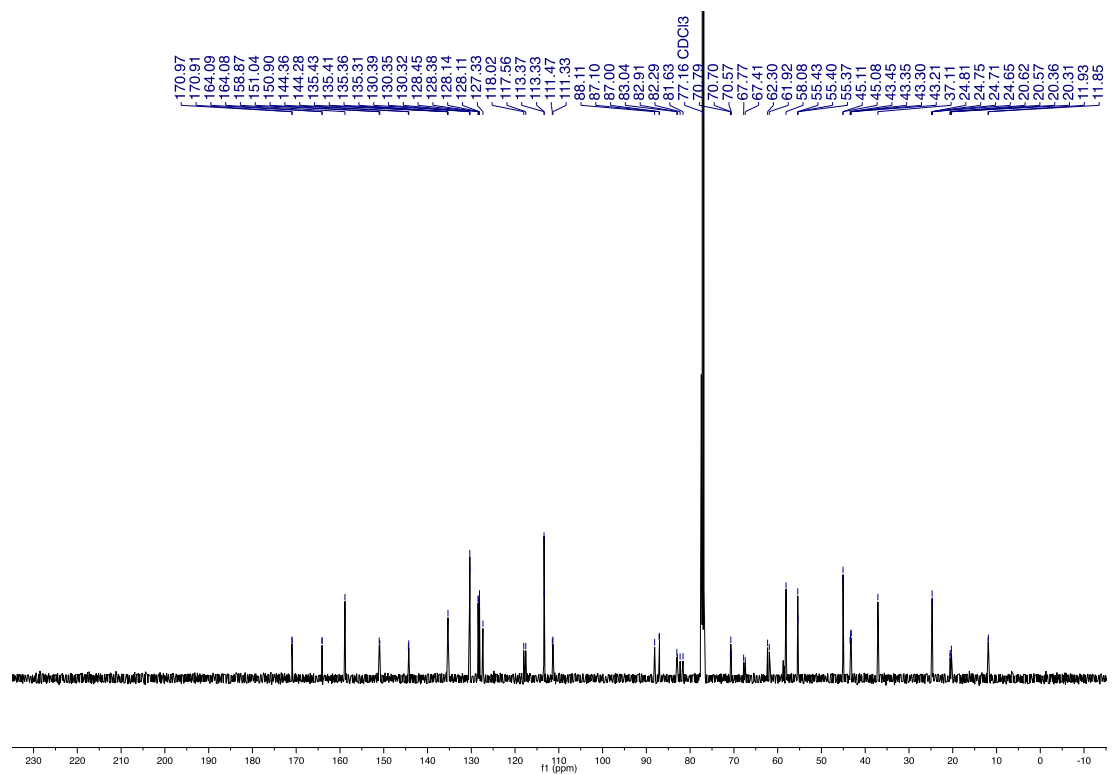

**<sup>1</sup>H-NMR of compound 5b (DMAECE)**

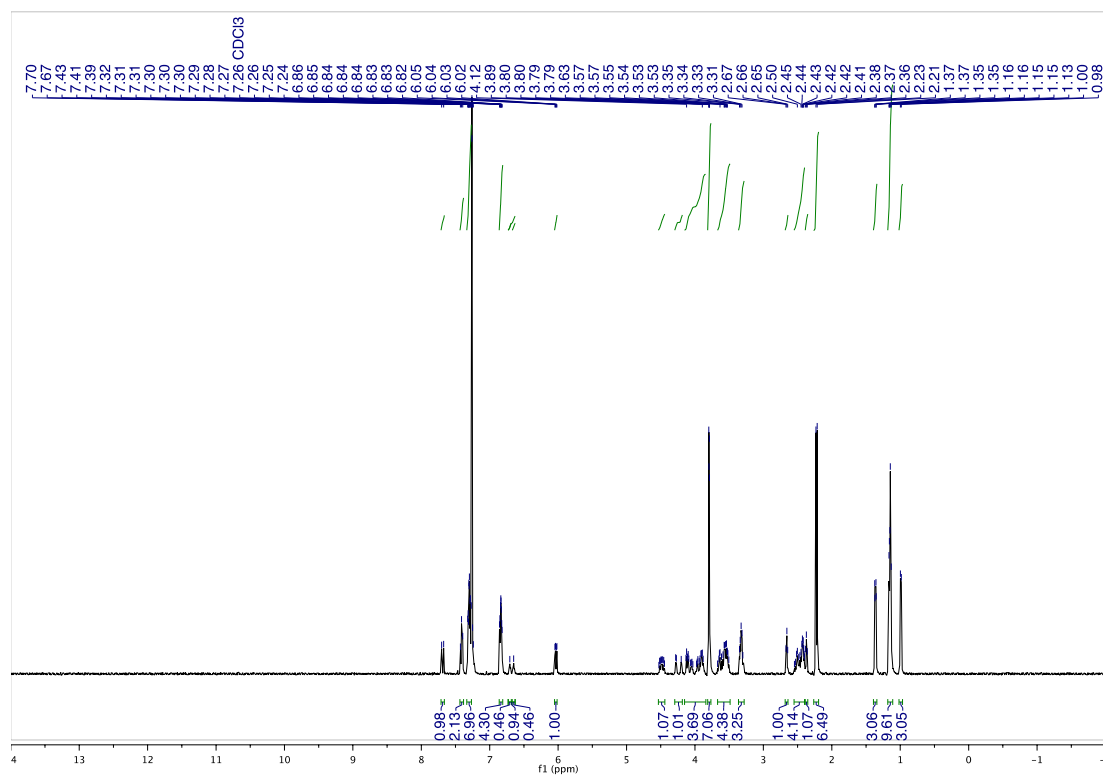

**<sup>13</sup>C-NMR of compound 5b (DMAECE)**

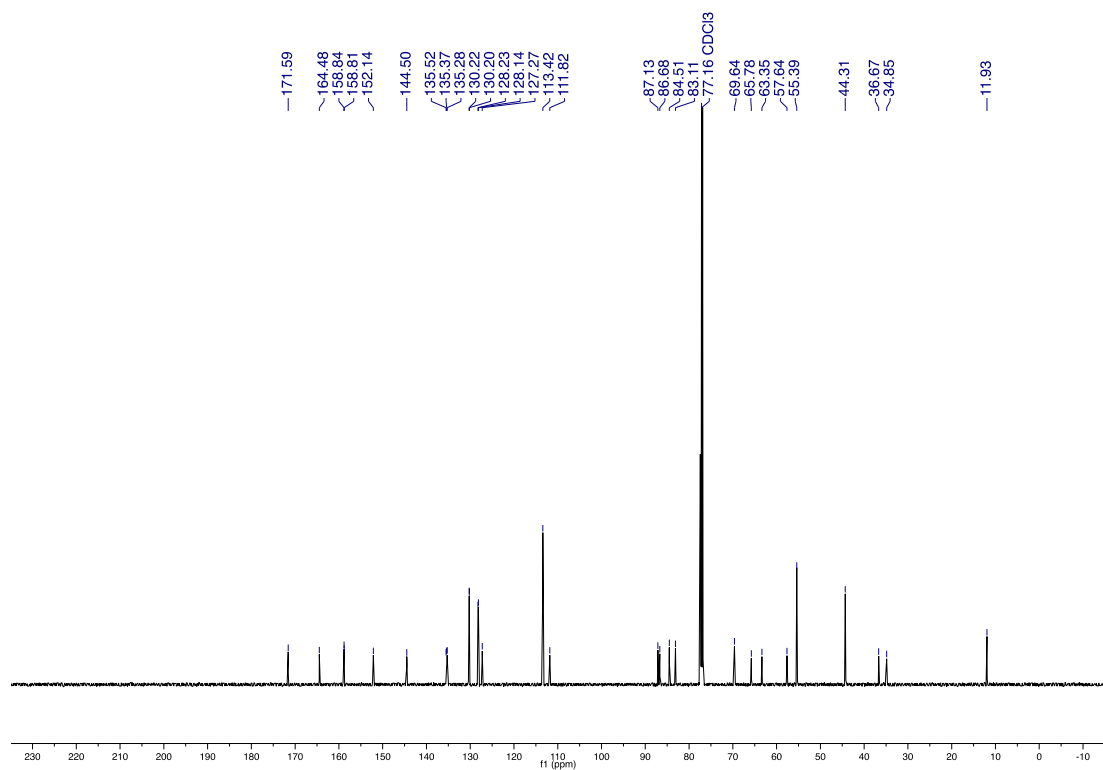

### $^{31}\text{P}$ -NMR of compound 5b (DMAECE)

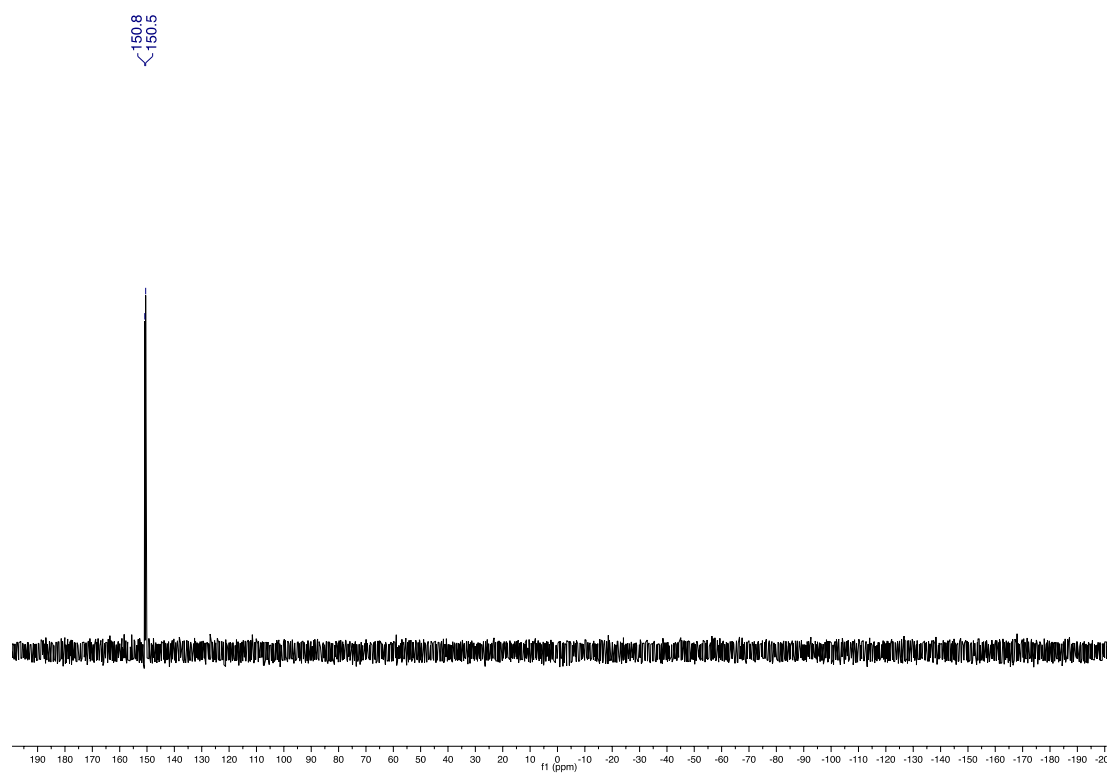

**<sup>1</sup>H-NMR of compound 4c (MorECE)**

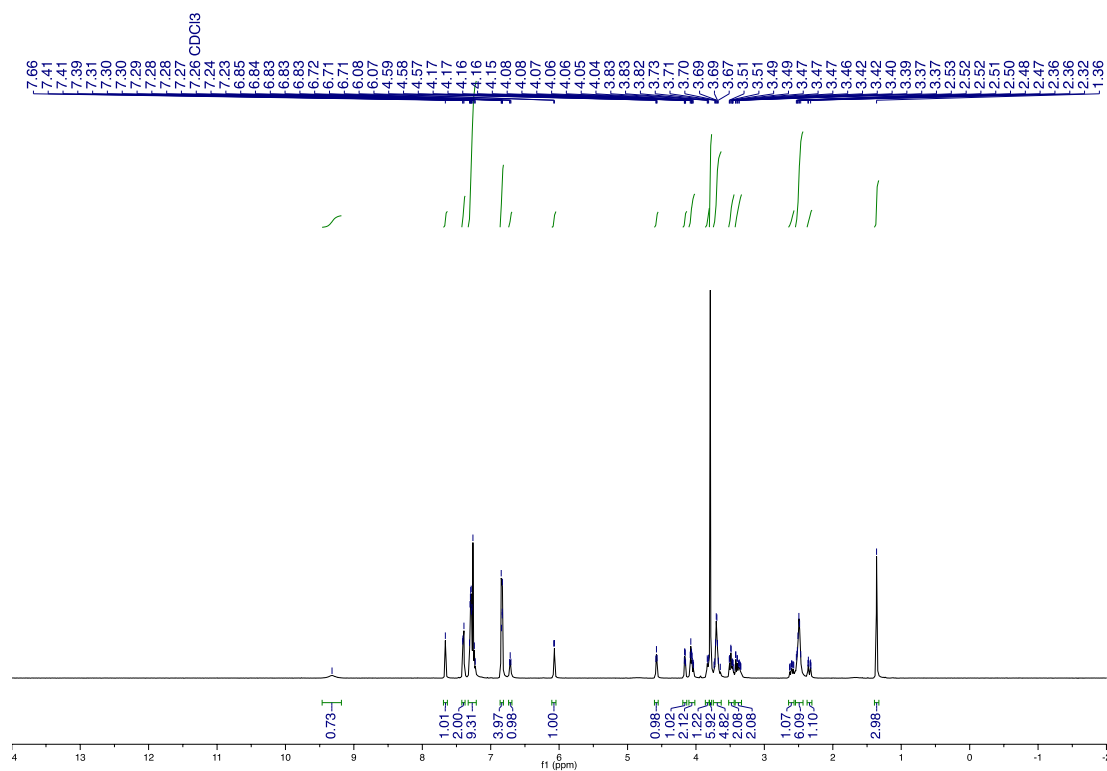

**<sup>13</sup>C-NMR of compound 4c (MorECE)**

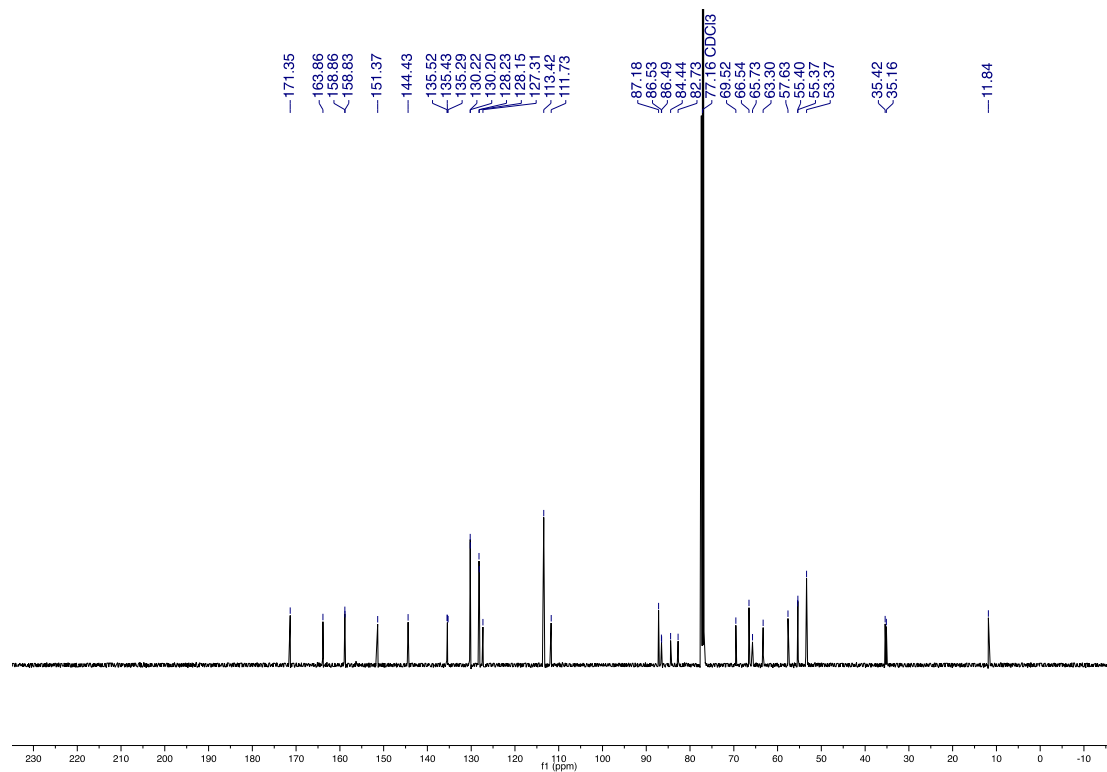

### <sup>1</sup>H-NMR of compound 5c (MorECE)

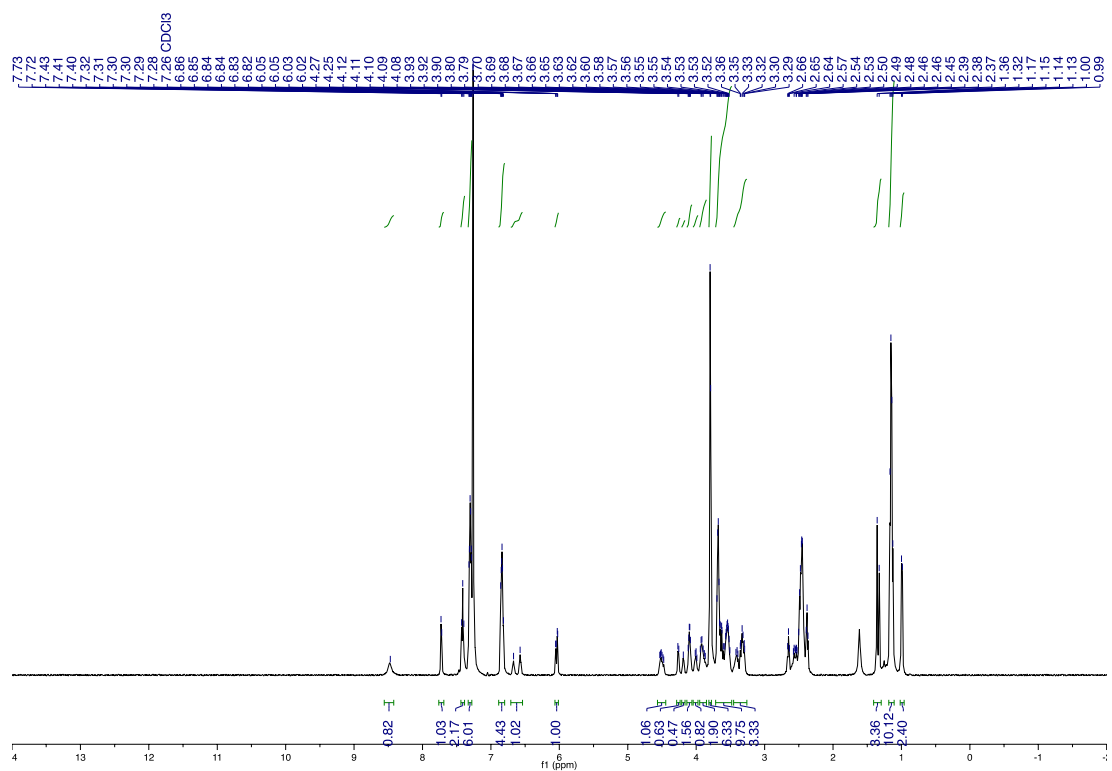

### <sup>13</sup>C-NMR of compound 5c (MorECE)

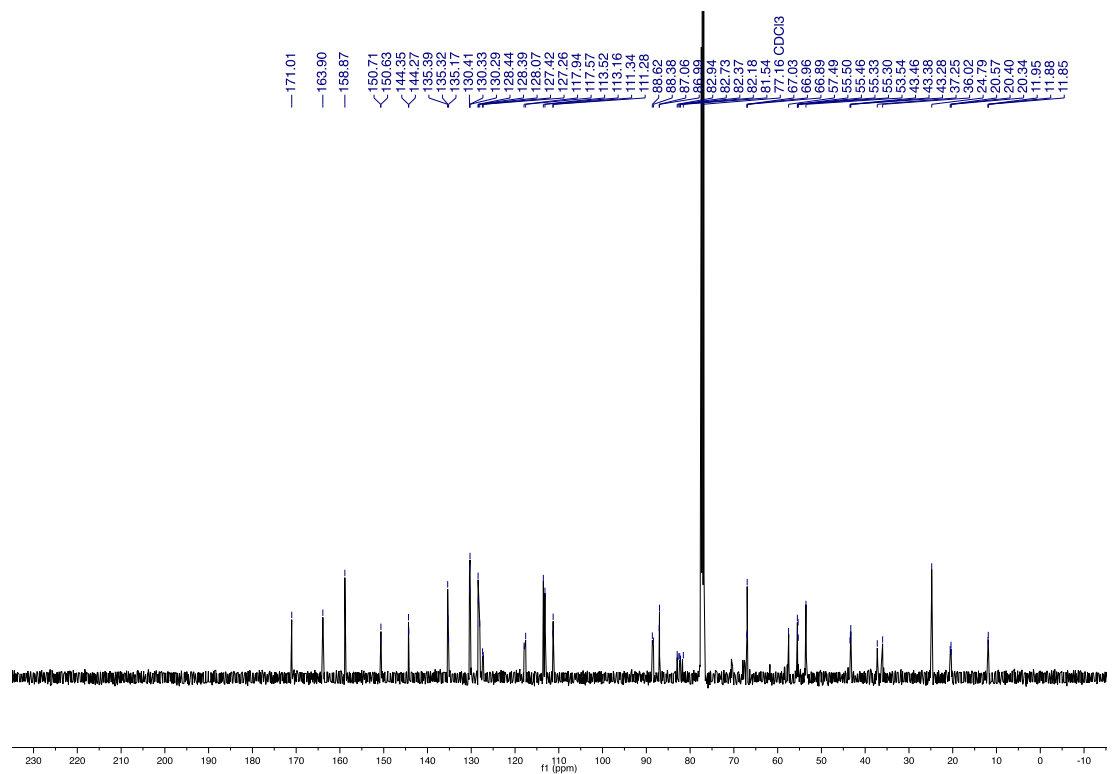

### <sup>31</sup>P-NMR of compound 5c (MorECE)

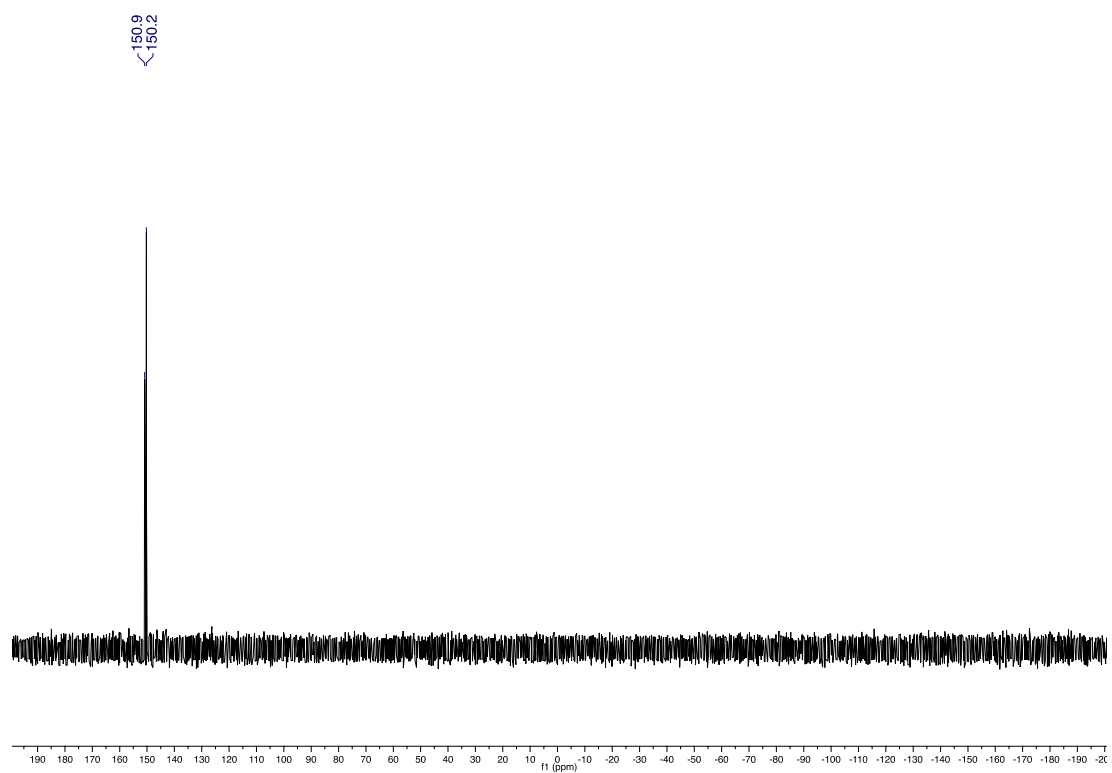

**<sup>1</sup>H-NMR of compound 4d (BzimECE)**

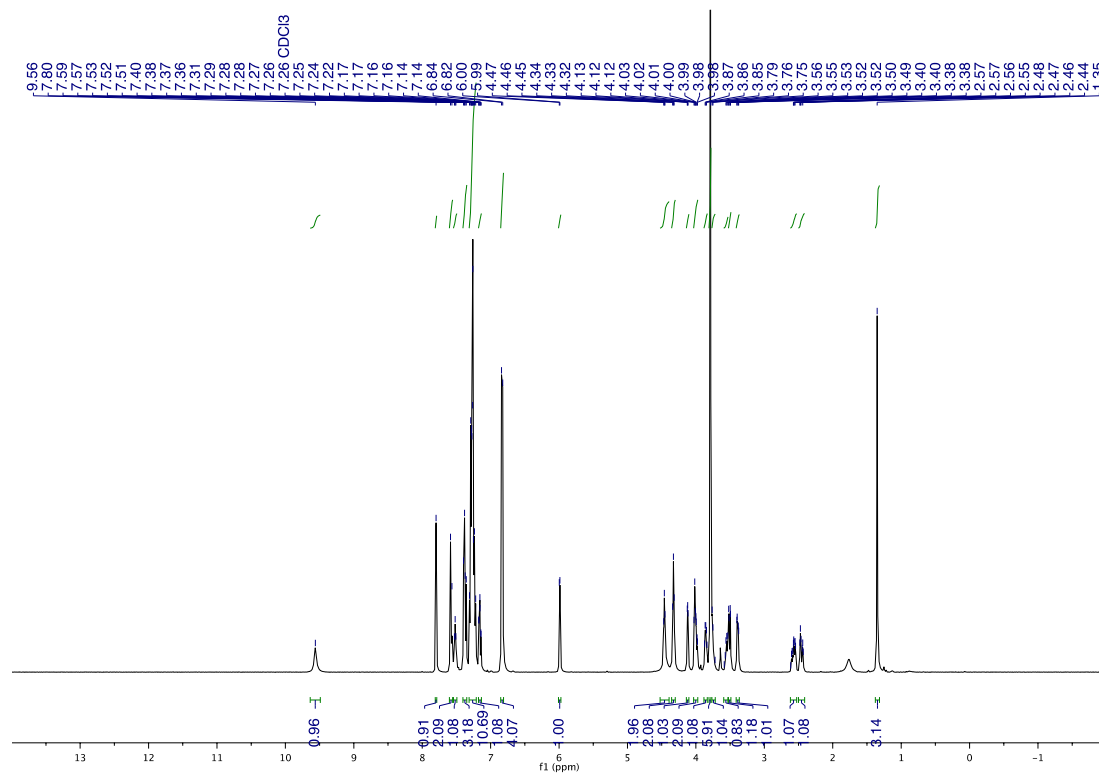

**<sup>13</sup>C-NMR of compound 4d (BzimECE)**

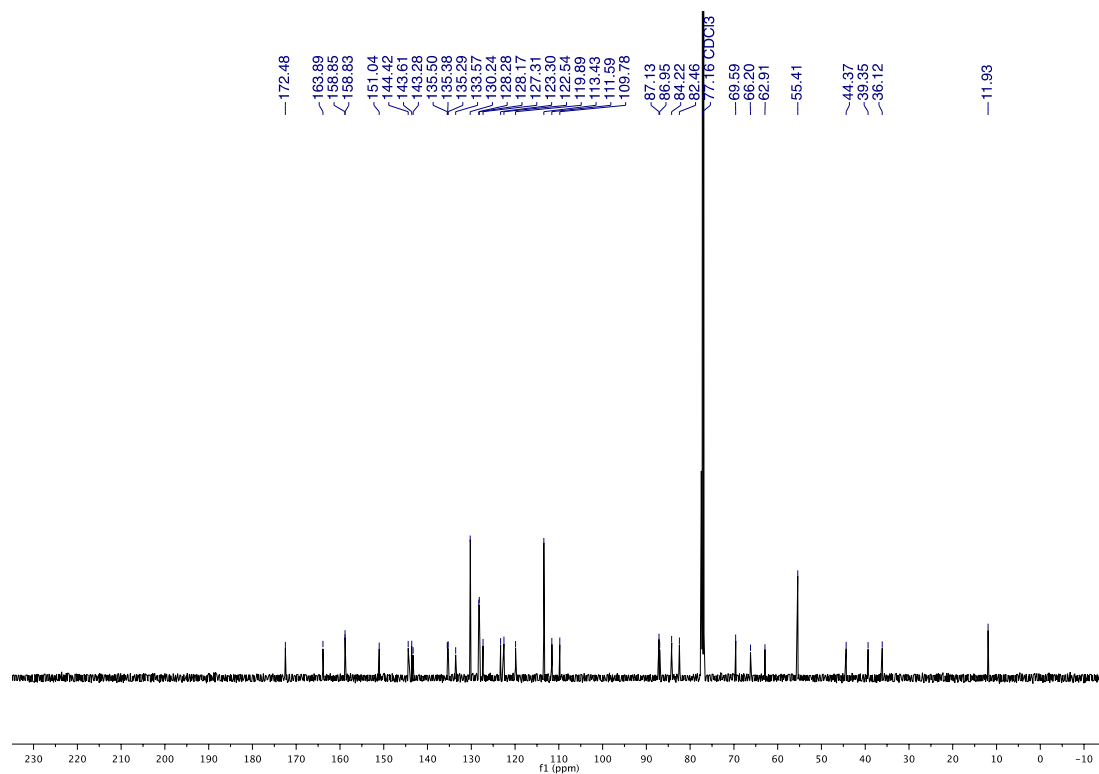

### <sup>1</sup>H-NMR of compound 5d (BzimECE)

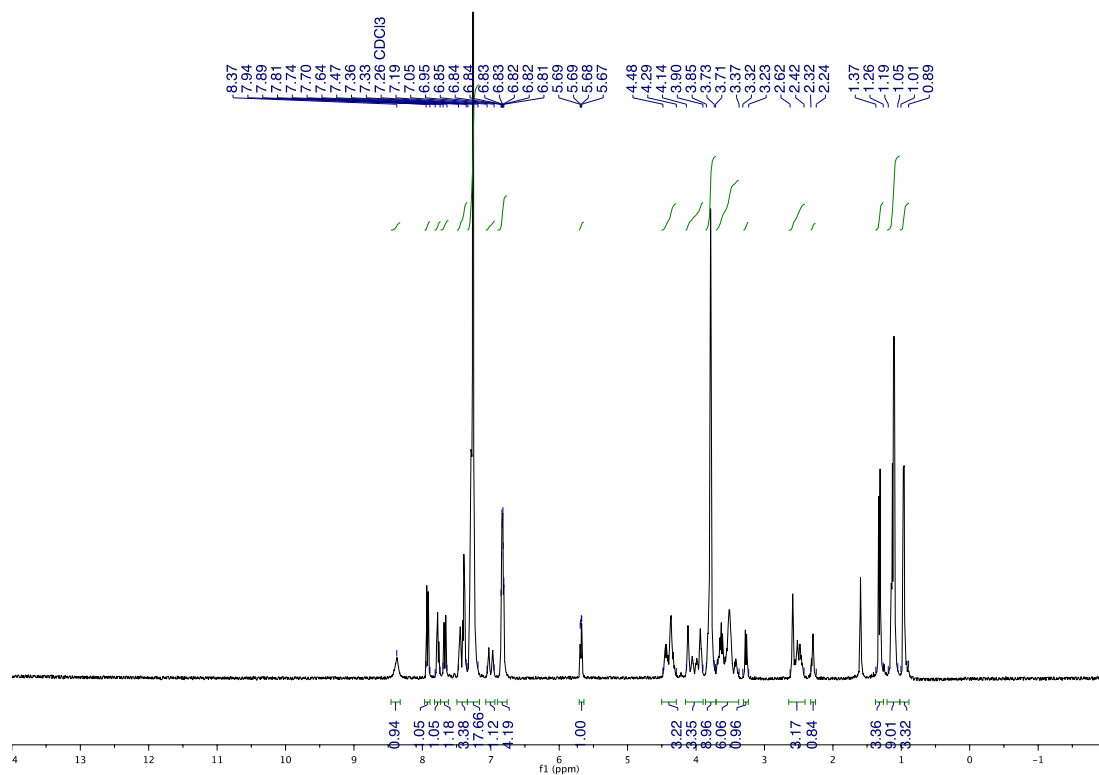

### <sup>13</sup>C-NMR of compound 5d (BzimECE)

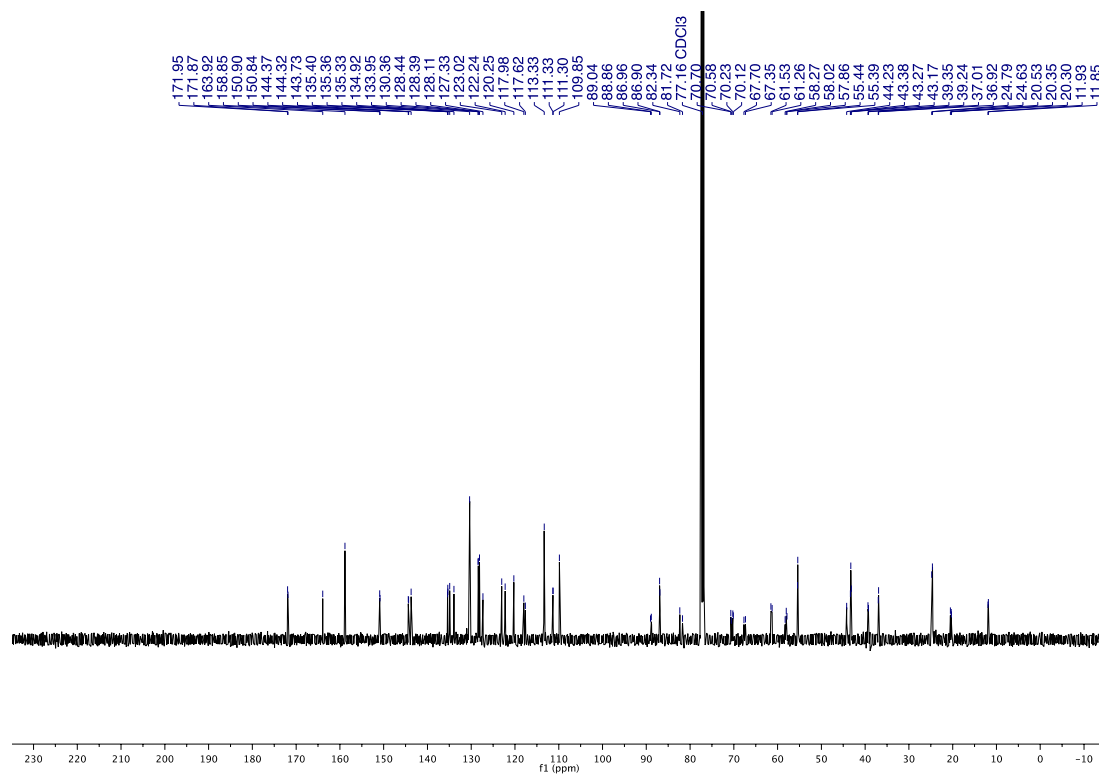



### <sup>31</sup>P-NMR of compound 5d (BzimECE)

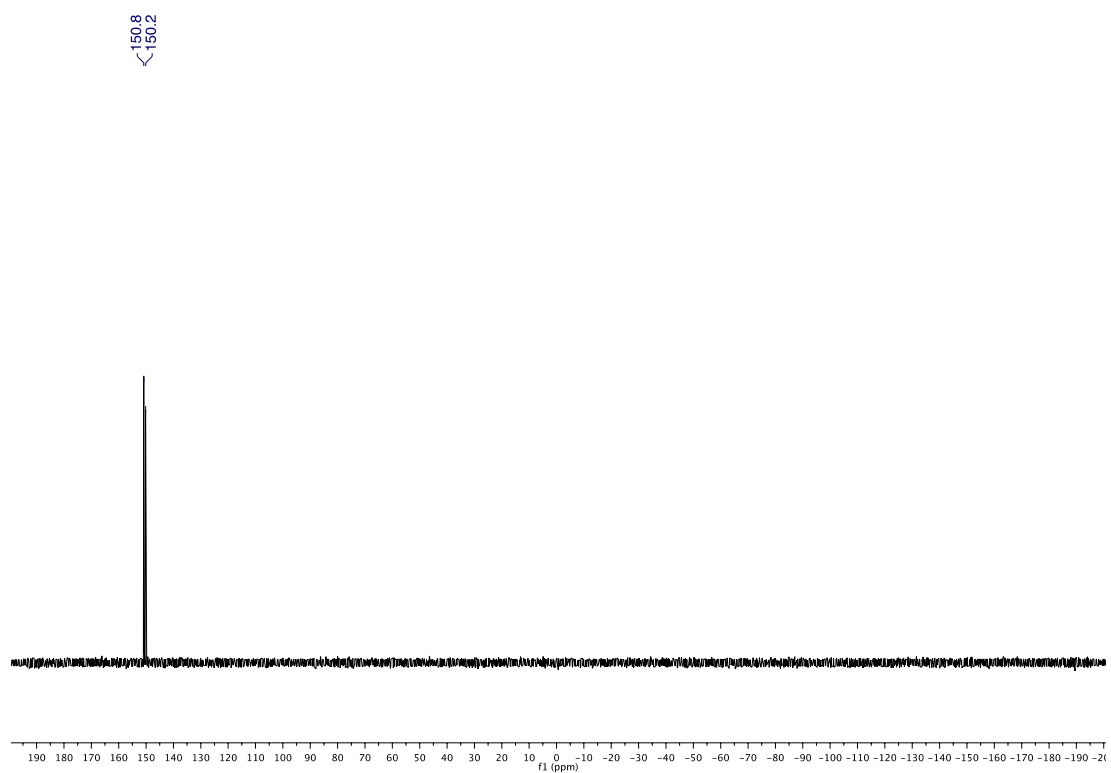

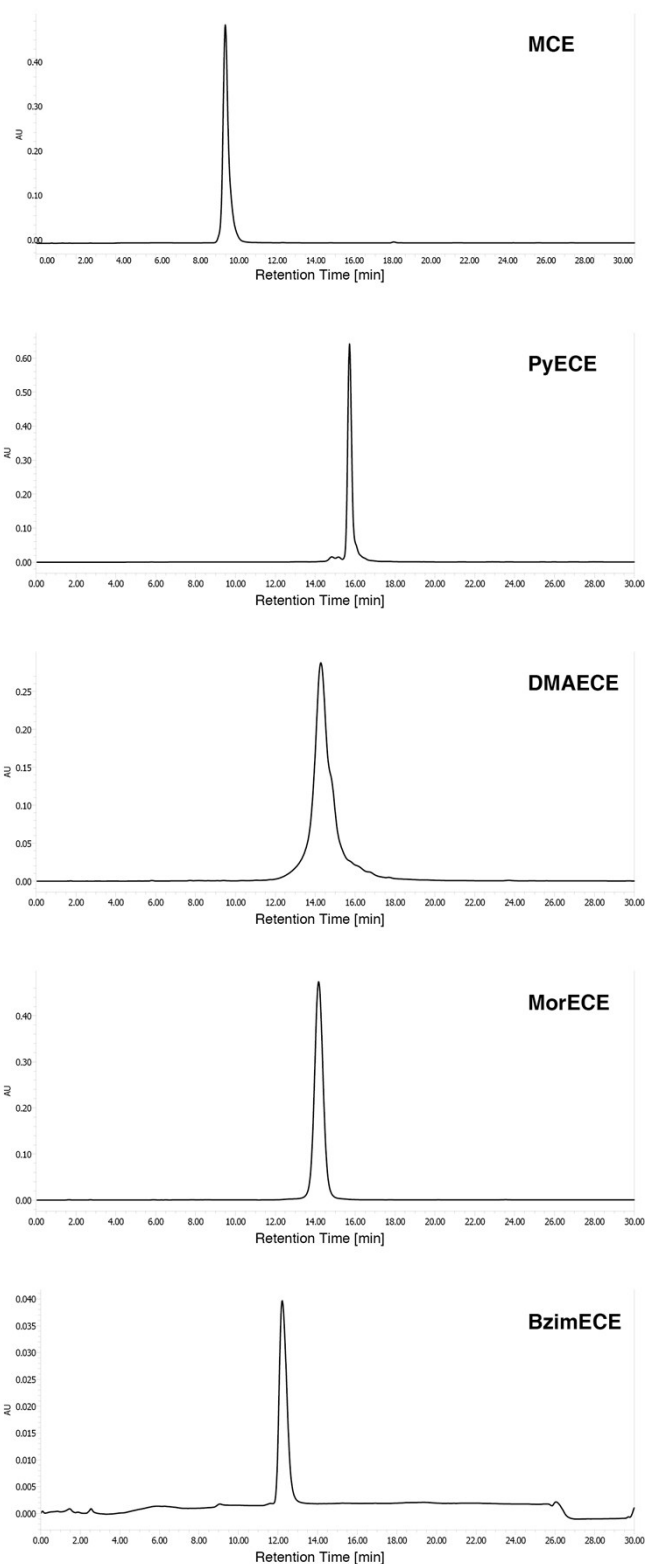

**Figure S1** HPLC chart of synthesized oligonucleotides for nuclease resistance. Mobile phase A: 30 mM  $\text{NH}_4\text{OAc}$  buffer Mobile phase B: 100% MeCN, linear gradient from 0 to 40 minutes was 0% to 40% B.

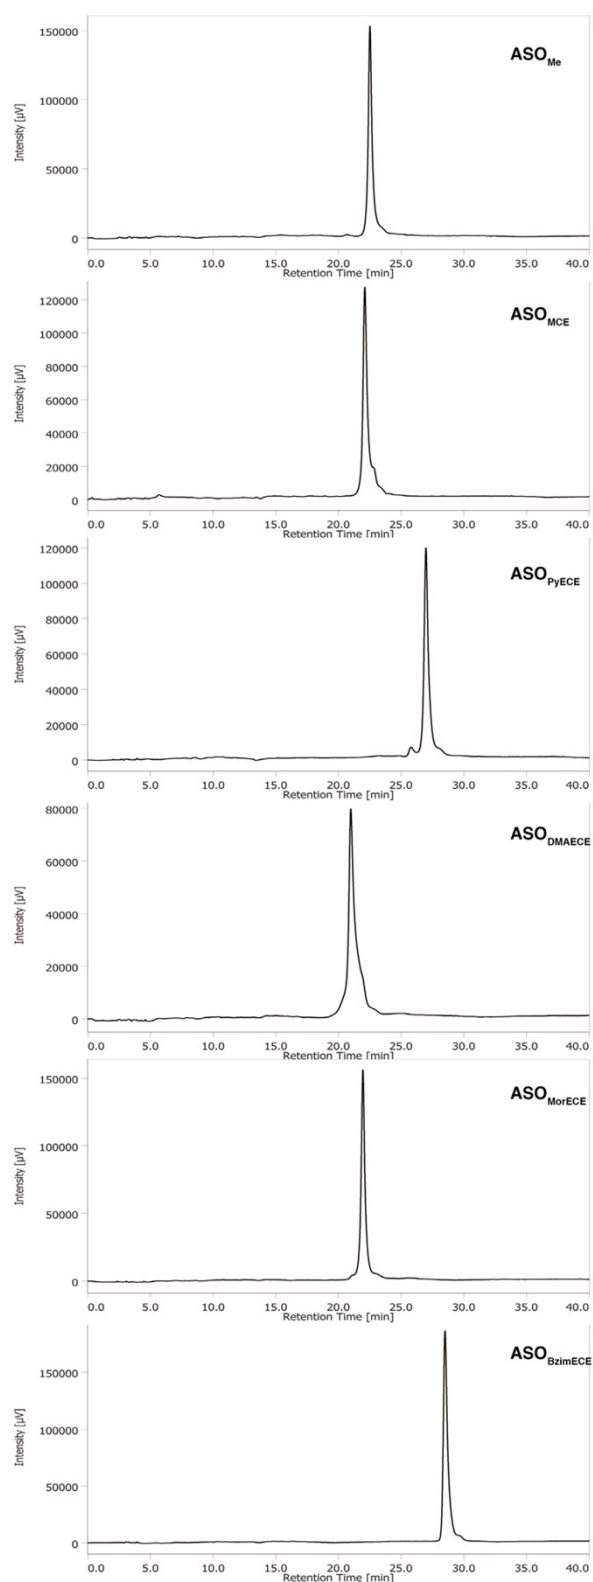

**Figure S2** HPLC chart of synthesized oligonucleotides for  $T_m$  and antisense activity. Mobile phase A: 8 mM TEA, 100 mM HFIP buffer Mobile phase B: 100% MeOH, linear gradient from 0 to 40 minutes was 0% to 40% B.

**Table S1.** Summary of mass values of synthesized oligonucleotide (MALDI-TOF-Mass)

| oligonucleotide              | calcd for [M+H] | found  | purity (RP-HPLC) |
|------------------------------|-----------------|--------|------------------|
| <b>MCE</b>                   | 6123.2          | 6125.7 | 98               |
| <b>PyECE</b>                 | 6487.6          | 6489.2 | 92               |
| <b>DMAECE</b>                | 6351.5          | 6353.6 | 89               |
| <b>MorECE</b>                | 6519.7          | 6521.9 | 98               |
| <b>BzimECE</b>               | 6643.8          | 6643.9 | 99               |
| <b>ASO<sub>Me</sub></b>      | 6775.5          | 6776.6 | 92               |
| <b>ASO<sub>MCE</sub></b>     | 7130.9          | 7132.7 | 89               |
| <b>ASO<sub>PyECE</sub></b>   | 7585.5          | 7587.4 | 89               |
| <b>ASO<sub>DMAECE</sub></b>  | 7416.4          | 7417.3 | 94               |
| <b>ASO<sub>MorECE</sub></b>  | 7626.6          | 7627.4 | 92               |
| <b>ASO<sub>BzimECE</sub></b> | 7781.7          | 7782.7 | 95               |

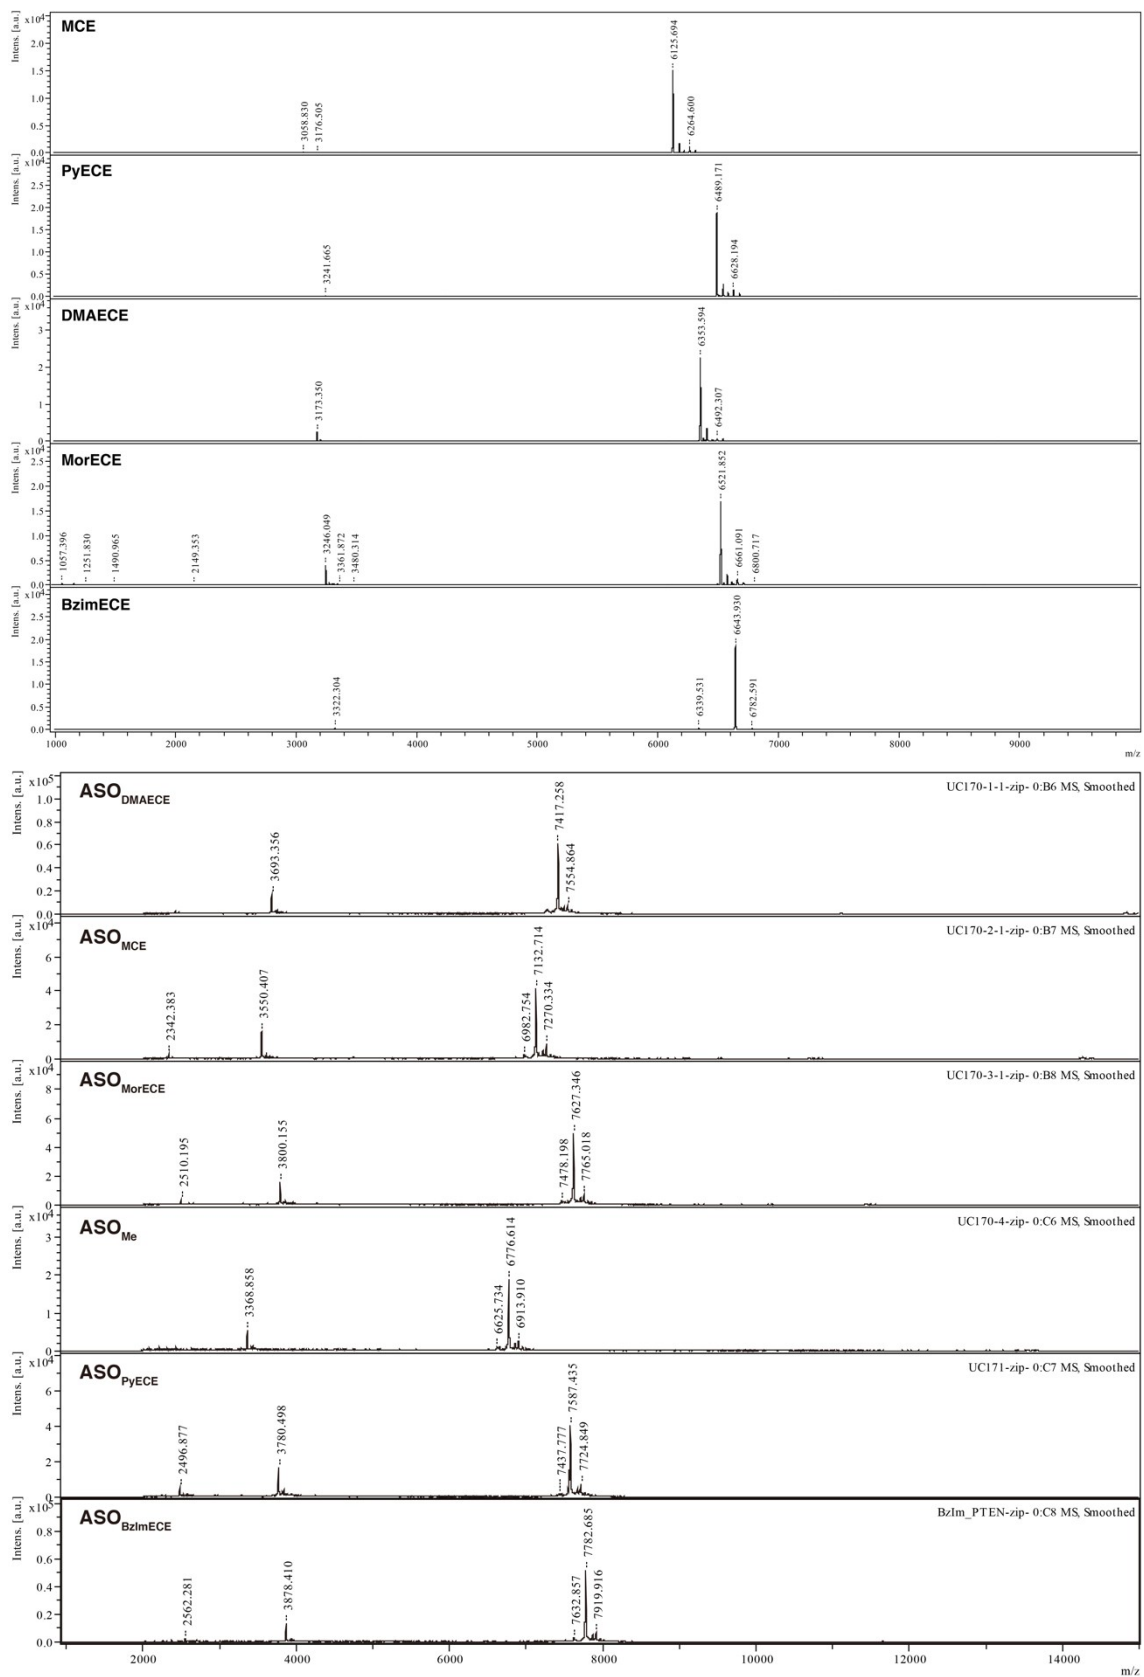

**Figure S3.** Observed MALDI-TOF-Mass spectrum of each oligonucleotide.

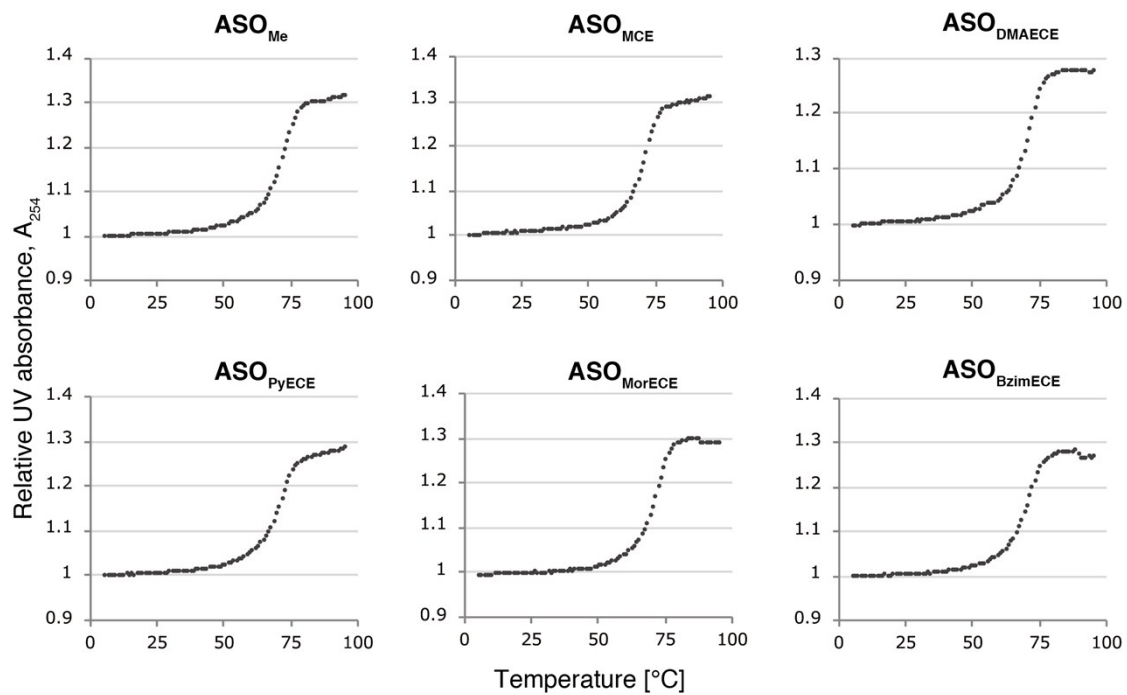

**Figure S4.** Observed melting curve of each duplex.
